# Supplementary material for: Formation of Branched and Chained Alginate Microfibers Using Theta-Glass Capillaries
Source: MDPI journal article supplement (doi:10.3390/mi9060303), 2018-06-17
Supplement: s1 [file s1]

# Supplementary Materials: Formation of Branched and Chained Alginate Microfibers Using Theta-Glass Capillaries

Keigo Nishimura, Yuya Morimoto, Nobuhito Mori and Shoji Takeuchi \*

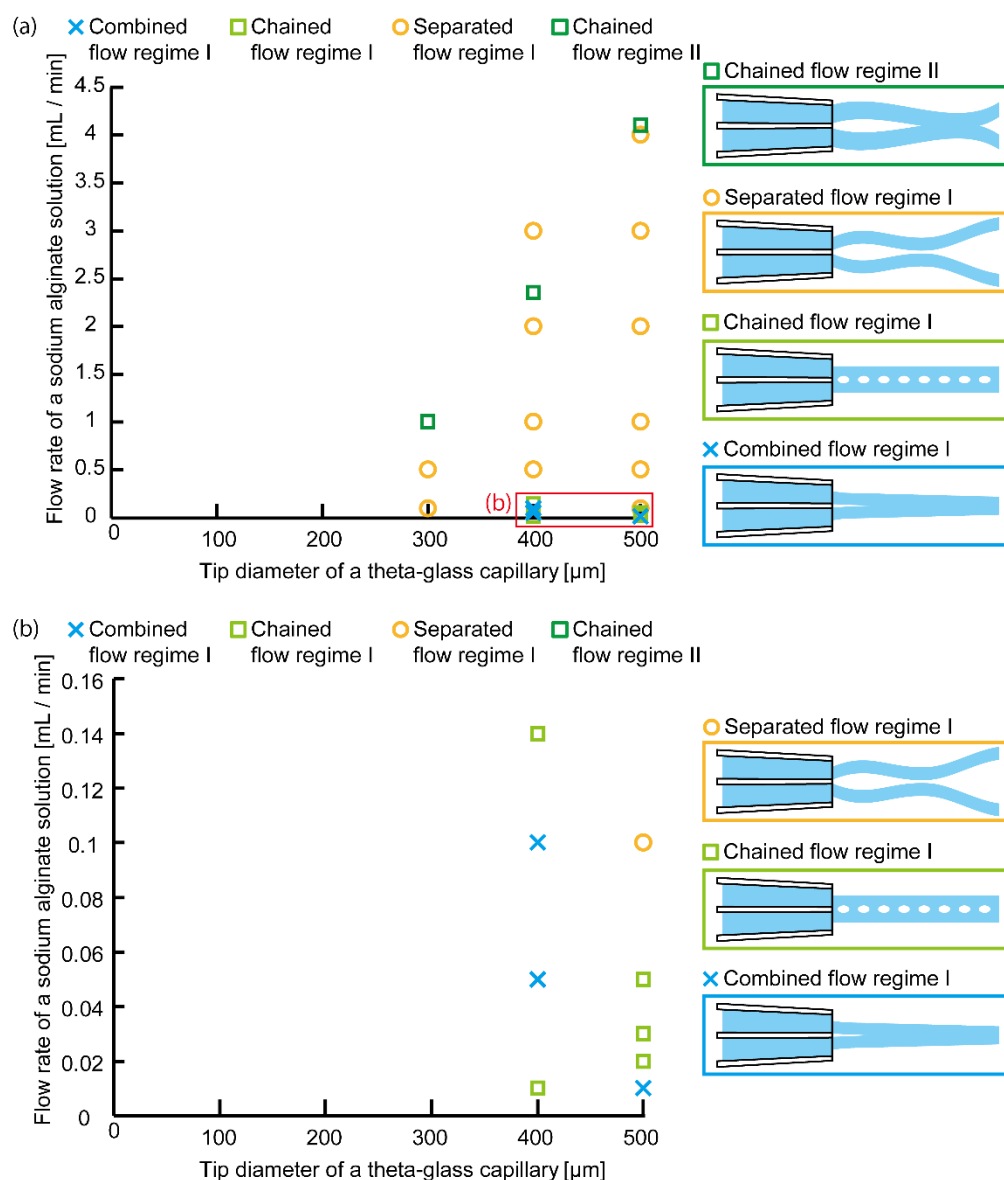

**Figure S1.** Experimental phases showing the relationships among the flow rates of the sodium alginate solution, the tip diameters of the theta-glass capillaries, and the flow regime in the region with a low flow rate and large tip diameter: (a) Experimental phases consisting of combined flow regime I, chained flow regime I, separated flow regime I, and chained flow regime II; (b) Enlarged view of red lined area in (a).

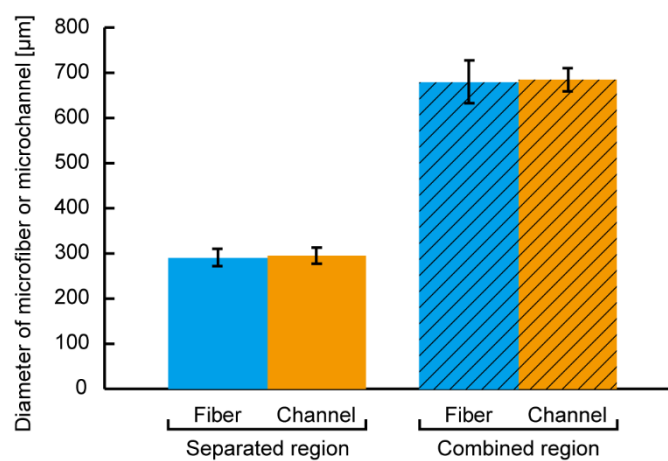

11

12 **Figure S2.** Diameters of the embedded microfiber and the PDMS microchannel; n=3; Error bars: S.D.
